# Supplementary material for: Multiplex vs. singleplex assay for the simultaneous identification of the three components of avian malaria vector-borne disease by DNA metabarcoding
Source: PeerJ. 2025 Mar 18;13:e19107. doi: 10.7717/peerj.19107 (PMC11927560; doi:10.7717/peerj.19107)
Supplement: Data S1 [file peerj-13-19107-s006.xlsx]

## Sheet: full.data.manuscript
sample	Mosquito.species..visual.identification.	Sampling.month	Sampling.year	Location	Trap.type	primer	sequence	scientific_name.Singleplex	rra.singleplex	reads.singleplex	scientific_name.Multiplex	rra.multiplex	reads.multiplex	taxonomy	sequence.multiplex
10a	Culex pipiens/Culex torrentium	September	2019	Laboratory	NA	Plas01	ttgattggttttactatttttggtacatagaagtacataaatgt	Plasmodium relictum	0.728603919	13214.75	Plasmodium relictum	0.666666667	600	Both (Same sequence)
10a	Culex pipiens/Culex torrentium	September	2019	Laboratory	NA	Culi01	aatttttaatcaataaaactggatcatttattcatatatttatgttaataaattttaaaagttttttaaattttaatatcaccccaataaaattttttattaaattataaattttaaaattctttttaatttataaataacaaaa	Culex sp.	1	16065	Culex sp.	1	2985	Both (Same sequence)
10a	Culex pipiens/Culex torrentium	September	2019	Laboratory	NA	Aves02_mix	attccataggctataccttgacctgtcttgttagcgtggtgaggctattgcgcccactgttgggctttcagtgtaggtggg	Passer domesticus	1	4370	Passer sp.	1	114	Both (Different sequence)	ataggctataccttgacctgtcttgttagcgtggtgaggctattgcgcccactgttgggctttcagtgtaggtggg
10a	Culex pipiens/Culex torrentium	September	2019	Laboratory	NA	Plas01	ttgattggttttactatttttggtacatagaagtacttatatgt	Plasmodium matutinum	0.271396081	4922.333333	Plasmodium matutinum	0.333333333	515	Both (Same sequence)
10Da	Culex pipiens/torrentium	July	2019	Dorigny	Sentinel	Plas01	ttgattggttttactatttttggtacatagaagtacataaatgt	NA	0	0	Plasmodium relictum	0.041843972	59	Only Multiplex
10Da	Culex pipiens/torrentium	July	2019	Dorigny	Sentinel	Aves02_mix	attccgtgggctataccttgacctgtcttgctagcgggttaggctattgcgtccactgttgggctatcaggaaaggtggg	NA	0	0	Turdus sp.	1	135	Only Multiplex
10Da	Culex pipiens/torrentium	July	2019	Dorigny	Sentinel	Plas01	ttgattggttttactatttttggtacatagaagtacttatatgt	Plasmodium matutinum	0.013755248	314.5	Plasmodium matutinum	0.035688794	50	Both (Same sequence)
10Da	Culex pipiens/torrentium	July	2019	Dorigny	Sentinel	Plas01	ttgattggtttaactattatttggtatattgaaataaagtatgt	Plasmodium vaughani	0.986244752	22549.5	Plasmodium vaughani	0.922467235	290	Both (Same sequence)
10Da	Culex pipiens/torrentium	July	2019	Dorigny	Sentinel	Culi01	aatttttaatcaataaaactggatcatttattcatatatttatgttaataaattttaaaagttttttaaattttaatatcaccccaataaaattttttattaaattataaattttaaaattctttttaatttataaataacaaaa	Culex sp.	1	24302	Culex sp.	1	6302	Both (Same sequence)
11a	Culex pipiens/Culex torrentium	September	2019	Laboratory	NA	Culi01	aatttttaatcaataaaactggatcatttattcatatatttatgttaataaattttaaaagttttttaaattttaatatcaccccaataaaattttttattaaattataaattttaaaattctttttaatttataaataacaaaa	Culex sp.	1	24367	Culex sp.	1	4647	Both (Same sequence)
11a	Culex pipiens/Culex torrentium	September	2019	Laboratory	NA	Plas01	ttgattggttttactatttttggtacatagaagtacataaatgt	Plasmodium relictum	0.87372475	11797.25	Plasmodium relictum	0.287260761	223	Both (Same sequence)
11a	Culex pipiens/Culex torrentium	September	2019	Laboratory	NA	Plas01	ttgattggttttactatttttggtacatagaagtacttatatgt	Plasmodium matutinum	0.12627525	1705	Plasmodium matutinum	0.712739239	274	Both (Same sequence)
11a	Culex pipiens/Culex torrentium	September	2019	Laboratory	NA	Aves02_mix	attccataggctataccttgacctgtcttgttagcgtggtgaggctattgcgcccactgttgggctttcagtgtaggtggg	Passer domesticus	1	560	Passer sp.	1	155	Both (Different sequence)	ataggctataccttgacctgtcttgttagcgtggtgaggctattgcgcccactgttgggctttcagtgtaggtggg
11Da	Culex pipiens/torrentium	July	2019	Dorigny	Gravid	Plas01	ttgattggttttactatttttggtacatagaagtacataaatgt	Plasmodium relictum	0.583622917	179	NA	0	0	Only Singleplex
11Da	Culex pipiens/torrentium	July	2019	Dorigny	Gravid	Culi01	aatttttaatcaataaaactggatcatttattcatatatttatgttaataaattttaaaagttttttaaattttaatatcaccccaataaaattttttattaaattataaattttaaaattctttttaatttataaataacaaaa	Culex sp.	1	19190	Culex sp.	1	5210	Both (Same sequence)
11Da	Culex pipiens/torrentium	July	2019	Dorigny	Gravid	Plas01	ttgattggtttaactatttttggtatattgaagtacttatatgt	Plasmodium sp.	0.416377083	277	NA	0	0	Only Singleplex
12a	Culex pipiens/Culex torrentium	September	2019	Laboratory	NA	Culi01	aatttttaatcaataaaactggatcatttattcatatatttatgttaataaattttaaaagttttttaaattttaatatcaccccaataaaattttttattaaattataaattttaaaattctttttaatttataaataacaaaa	Culex sp.	1	7099	Culex sp.	1	7875	Both (Same sequence)
12a	Culex pipiens/Culex torrentium	September	2019	Laboratory	NA	Plas01	ttgattggttttactatttttggtacatagaagtacttatatgt	Plasmodium matutinum	0.179149927	2809.25	NA	0	0	Only Singleplex
12a	Culex pipiens/Culex torrentium	September	2019	Laboratory	NA	Plas01	ttgattggttttactatttttggtacatagaagtacataaatgt	Plasmodium relictum	0.820850073	12871.75	NA	0	0	Only Singleplex
12a	Culex pipiens/Culex torrentium	September	2019	Laboratory	NA	Aves02_mix	attccataggctataccttgacctgtcttgttagcgtggtgaggctattgcgcccactgttgggctttcagtgtaggtggg	Passer domesticus	1	3879	Passer sp.	1	163	Both (Different sequence)	ataggctataccttgacctgtcttgttagcgtggtgaggctattgcgcccactgttgggctttcagtgtaggtggg
12Da	Culex pipiens/torrentium	July	2019	Dorigny	Sentinel	Aves02_mix	attccataggctataccttgacctgtcttattagcgtaacggggctattgcgctcactgttgagctgtcaggggaggtgag	Passeriformes	0.001482813	33	NA	0	0	Only Singleplex
12Da	Culex pipiens/torrentium	July	2019	Dorigny	Sentinel	Culi01	aatttttaatcaataaaactggatcatttattcatatatttatgttaataaattttaaaagttttttaaattttaatatcaccccaataaaattttttattaaattataaattttaaaattctttttaatttataaataacaaaa	Culex sp.	1	19425	Culex sp.	1	4934	Both (Same sequence)
12Da	Culex pipiens/torrentium	July	2019	Dorigny	Sentinel	Aves02_mix	attccgtgggctataccttgacctgtcttgctagcgggttaggctattgcgtccactgttgggctatcaggaaaggtggg	Turdus sp.	0.998517187	22222	Turdus sp.	1	199	Both (Different sequence)	gtgggctataccttgacctgtcttgctagcgggttaggctattgcgtccactgttgggctatcaggaaaggtggg
12Da	Culex pipiens/torrentium	July	2019	Dorigny	Sentinel	Plas01	ttgattggtttaactattatttggtatattgaaataaagtatgt	Plasmodium vaughani	1	23612.25	Plasmodium vaughani	1	324	Both (Same sequence)
13a	Culex pipiens/Culex torrentium	September	2019	Laboratory	NA	Aves02_mix	attccataggctataccttgacctgtcttgttagcgtggtgaggctattgcgcccactgttgggctttcagtgtaggtggg	Passer domesticus	1	2822	NA	0	0	Only Singleplex
13a	Culex pipiens/Culex torrentium	September	2019	Laboratory	NA	Culi01	aatttttaatcaataaaactggatcatttattcatatatttatgttaataaattttaaaagttttttaaattttaatatcaccccaataaaattttttattaaattataaattttaaaattctttttaatttataaataacaaaa	Culex sp.	1	11626	Culex sp.	1	8492	Both (Same sequence)
13a	Culex pipiens/Culex torrentium	September	2019	Laboratory	NA	Plas01	ttgattggttttactatttttggtacatagaagtacataaatgt	Plasmodium relictum	1	12244	Plasmodium relictum	1	467	Both (Same sequence)
13Da	Culex pipiens/torrentium	July	2019	Dorigny	Gravid	Culi01	aatttttaatcaataaaactggatcatttattcatatatttatgttaataaattttaaaagttttttaaattttaatatcaccccaataaaattttttattaaattataaattttaaaattctttttaatttataaataacaaaa	Culex sp.	1	13736	Culex sp.	1	9677	Both (Same sequence)
13Da	Culex pipiens/torrentium	July	2019	Dorigny	Gravid	Aves02_mix	attccgtaggctataccttgacctgtcttgctagtgggttaggctattgcgtccactgttgggctgtcaggaaaggtggg	Turdus sp.	0.391418884	16047	NA	0	0	Only Singleplex
13Da	Culex pipiens/torrentium	July	2019	Dorigny	Gravid	Plas01	ttgattggtttaactatttttggtatattgaagtacttatatgt	Plasmodium sp.	0.666666667	26	NA	0	0	Only Singleplex
13Da	Culex pipiens/torrentium	July	2019	Dorigny	Gravid	Plas01	ttgattggttttactatttttggtacatagaagtacataaatgt	Plasmodium relictum	0.333333333	16	NA	0	0	Only Singleplex
13Da	Culex pipiens/torrentium	July	2019	Dorigny	Gravid	Aves02_mix	attccataggctataccttgacctgtcttattagcgtaacggggctattgcgctcactgttgagctgtcaggggaggtgag	Passeriformes	0.608581116	24950	Passeriformes	1	110	Both (Same sequence)
14a	Culex pipiens/Culex torrentium	September	2019	Laboratory	NA	Culi01	aatttttaatcaataaaactggatcatttattcatatatttatgttaataaattttaaaagttttttaaattttaatatcaccccaataaaattttttattaaattataaattttaaaattctttttaatttataaataacaaaa	Culex sp.	1	15554	Culex sp.	1	1899	Both (Same sequence)
14a	Culex pipiens/Culex torrentium	September	2019	Laboratory	NA	Aves02_mix	attccataggctataccttgacctgtcttgttagcgtggtgaggctattgcgcccactgttgggctttcagtgtaggtggg	Passer domesticus	1	1722	Passer sp.	1	213	Both (Different sequence)	ataggctataccttgacctgtcttgttagcgtggtgaggctattgcgcccactgttgggctttcagtgtaggtggg
14a	Culex pipiens/Culex torrentium	September	2019	Laboratory	NA	Plas01	ttgattggttttactatttttggtacatagaagtacataaatgt	Plasmodium relictum	1	12611.66667	Plasmodium relictum	1	673	Both (Same sequence)
14Da	Culex pipiens/torrentium	July	2019	Dorigny	Net	Plas01	ttgattggtttaactatttttggtatattgaagtacttatatgt	Plasmodium sp.	1	11	NA	0	0	Only Singleplex
14Da	Culex pipiens/torrentium	July	2019	Dorigny	Net	Culi01	aatttttaatcaataaaactggatcatttattcatatatttatgttaataaattttaaaagttttttaaattttaatatcaccccaataaaattttttattaaattataaattttaaaattctttttaatttataaataacaaaa	Culex sp.	1	21814	Culex sp.	1	23652	Both (Same sequence)
15a	Culex pipiens/Culex torrentium	September	2019	Laboratory	NA	Culi01	aatttttaatcaataaaactggatcatttattcatatatttatgttaataaattttaaaagttttttaaattttaatatcaccccaataaaattttttattaaattataaattttaaaattctttttaatttataaataacaaaa	Culex sp.	1	15265	Culex sp.	1	3538	Both (Same sequence)
15a	Culex pipiens/Culex torrentium	September	2019	Laboratory	NA	Plas01	ttgattggttttactatttttggtacatagaagtacataaatgt	Plasmodium relictum	1	10389.25	Plasmodium relictum	1	428	Both (Same sequence)
15a	Culex pipiens/Culex torrentium	September	2019	Laboratory	NA	Aves02_mix	attccataggctataccttgacctgtcttgttagcgtggtgaggctattgcgcccactgttgggctttcagtgtaggtggg	Passer domesticus	1	758	Passer sp.	1	123	Both (Different sequence)	ataggctataccttgacctgtcttgttagcgtggtgaggctattgcgcccactgttgggctttcagtgtaggtggg
15Da	Culex pipiens/torrentium	July	2019	Dorigny	Sentinel	Aves02_mix	attccgtgggctataccttgacctgtcttgctagcgggttaggctattgcgtccactgttgggctatcaggaaaggtggg	Turdus sp.	1	14423	Turdus sp.	1	122	Both (Different sequence)	gtgggctataccttgacctgtcttgctagcgggttaggctattgcgtccactgttgggctatcaggaaaggtggg
15Da	Culex pipiens/torrentium	July	2019	Dorigny	Sentinel	Plas01	ttgattggtttaactattatttggtatattgaaataaagtatgt	Plasmodium vaughani	1	18286.75	Plasmodium vaughani	0.983901515	167	Both (Same sequence)
15Da	Culex pipiens/torrentium	July	2019	Dorigny	Sentinel	Plas01	tgtttgccagctgtgagctgcgacggcggtatgatgtacactgg	NA	0	0	Plasmodium sp.	0.016098485	17	Only Multiplex
15Da	Culex pipiens/torrentium	July	2019	Dorigny	Sentinel	Culi01	aatttttaatcaataaaactggatcatttattcatatatttatgttaataaattttaaaagttttttaaattttaatatcaccccaataaaattttttattaaattataaattttaaaattctttttaatttataaataacaaaa	Culex sp.	1	15299	Culex sp.	1	15938	Both (Same sequence)
16Da	Culex pipiens/torrentium	July	2019	Dorigny	Gravid	Plas01	ttgattggtttaactatttttggtatattgaagtacttatatgt	Plasmodium sp.	1	13	NA	0	0	Only Singleplex
16Da	Culex pipiens/torrentium	July	2019	Dorigny	Gravid	Culi01	aatttttaatcaataaaactggatcatttattcatatatttatgttaataaattttaaaagttttttaaattttaatatcaccccaataaaattttttattaaattataaattttaaaattctttttaatttataaataacaaaa	Culex sp.	1	5682	NA	0	0	Only Singleplex
17Da	Culex pipiens/torrentium	July	2019	Dorigny	Sentinel	Culi01	aatttttaatcaataaaactggatcatttattcatatatttatgttaataaattttaaaagttttttaaattttaatatcaccccaataaaattttttattaaattataaattttaaaattctttttaatttataaataacaaaa	Culex sp.	1	23125	Culex sp.	1	7887	Both (Same sequence)
17Da	Culex pipiens/torrentium	July	2019	Dorigny	Sentinel	Aves02_mix	attccataggctataccttgacctgtcttattagcgtggttgggctattgcgcccactgttggtctttcagtgtaggtggg	Passer montanus	1	5219	Passer montanus	1	227	Both (Different sequence)	ataggctataccttgacctgtcttattagcgtggttgggctattgcgcccactgttggtctttcagtgtaggtggg
18Da	Culex pipiens/torrentium	July	2019	Dorigny	Sentinel	Plas01	ttgattggttttactatttttggtacatagaagtacataaatgt	Plasmodium relictum	1	54	NA	0	0	Only Singleplex
18Da	Culex pipiens/torrentium	July	2019	Dorigny	Sentinel	Culi01	aatttttaatcaataaaactggatcatttattcatatatttatgttaataaattttaaaagttttttaaattttaatatcaccccaataaaattttttattaaattataaattttaaaattctttttaatttataaataacaaaa	Culex sp.	1	31074	Culex sp.	1	8996	Both (Same sequence)
18Da	Culex pipiens/torrentium	July	2019	Dorigny	Sentinel	Aves02_mix	attccataggctataccttgacctgtcttactagcggggtaggctattgcgtccactgttggtccttcatgcggggtggg	NA	0	0	Sylvia atricapilla	1	829	Only Multiplex
19Da	Culex pipiens/torrentium	July	2019	Dorigny	Sentinel	Plas01	ttgattggttttactatttttggtacatagaagtacttatatgt	Plasmodium sp.	0.5	32	NA	0	0	Only Singleplex
19Da	Culex pipiens/torrentium	July	2019	Dorigny	Sentinel	Plas01	ttgattggttttactatttttggtacatagaagtacataaatgt	Plasmodium relictum	0.5	30	NA	0	0	Only Singleplex
19Da	Culex pipiens/torrentium	July	2019	Dorigny	Sentinel	Culi01	aatttttaatcaataaaactggatcatttattcatatatttatgttaataaattttaaaagttttttaaattttaatatcaccccaataaaattttttattaaattataaattttaaaattctttttaatttataaataacaaaa	Culex sp.	1	31330	Culex sp.	1	12607	Both (Same sequence)
1a	Culex pipiens/Culex torrentium	September	2019	Laboratory	NA	Aves02_mix	ataggctataccttgacctgtcgtattagcgtggtggggctgttgcgctcactgttgggctttcagggtaggtgaa	Fringillidae	1	25960	Fringillidae	1	140	Both (Same sequence)
1a	Culex pipiens/Culex torrentium	September	2019	Laboratory	NA	Culi01	aatttttaatcaataaaactggatcatttattcatatatttatgttaataaattttaaaagttttttaaattttaatatcaccccaataaaattttttattaaattataaattttaaaattctttttaatttataaataacaaaa	Culex sp.	1	80972	Culex sp.	1	9236	Both (Same sequence)
1a	Culex pipiens/Culex torrentium	September	2019	Laboratory	NA	Plas01	ttgattggttttactatttttggtacatagaagtacataaatgt	Plasmodium relictum	1	16964.5	Plasmodium relictum	1	98	Both (Same sequence)
1Da	Culex pipiens/torrentium	June	2019	Dorigny	Sentinel	Aves02_mix	attccatgggctataccttgacctgtcttattagcgtggtggggctattgcgctcactgttgatctttcaggggaggtggg	Certhia brachydactyla	0.00060623	13	NA	0	0	Only Singleplex
1Da	Culex pipiens/torrentium	June	2019	Dorigny	Sentinel	Aves02_mix	attccataggctataccttgacctgtcgtattagcggggtggggctgttgcgtccactgttgggccctcaggaggggtggg	Cyanistes caeruleus	0.00135236	29	NA	0	0	Only Singleplex
1Da	Culex pipiens/torrentium	June	2019	Dorigny	Sentinel	Plas01	ttgattggtttaactattatttggtatattgaaataaagtatgt	Plasmodium vaughani	1	19267	Plasmodium vaughani	1	861	Both (Same sequence)
1Da	Culex pipiens/torrentium	June	2019	Dorigny	Sentinel	Aves02_mix	attccatgggctataccttgacctgtattagcggggggctgttgcgtccactgttgggccctcaggaggggtggg	Parus major	0.99804141	21402	Parus major	1	168	Both (Different sequence)	atgggctataccttgacctgtcgtattagcggggggctgttgcgtccactgttgggccctcaggaggggtggg
1Da	Culex pipiens/torrentium	June	2019	Dorigny	Sentinel	Culi01	aatttttaatcaataaaactggatcatttattcatatatttatgttaataaattttaaaagttttttaaattttaatatcaccccaataaaattttttattaaattataaattttaaaattctttttaatttataaataacaaaa	Culex sp.	1	41437	Culex sp.	1	10311	Both (Same sequence)
1Ma	Aedes/Ochlerotatus	June	2019	Monods	Net	Culi01	attttttaatcaataaaactggatcaattattcatatattaatgttaataaataataaaagttatttaaattttaataccaccccagtaaaattttttattaaaatataaatttaattattctttttaatttataattaacaaaa	Ochlerotatus sp.	1	82874	Ochlerotatus sp.	1	12141	Both (Same sequence)
20Da	Culex pipiens/torrentium	July	2019	Dorigny	Sentinel	Culi01	aatttttaatcaataaaactggatcatttattcatatatttatgttaataaattttaaaagttttttaaattttaatatcaccccaataaaattttttattaaattataaattttaaaattctttttaatttataaataacaaaa	Culex sp.	1	11440	Culex sp.	1	3912	Both (Same sequence)
21Da	Culex pipiens/torrentium	July	2019	Dorigny	Gravid	Plas01	ttgattggttttactatttttggtacatagaagtacataaatgt	Plasmodium relictum	0.601866991	223	NA	0	0	Only Singleplex
21Da	Culex pipiens/torrentium	July	2019	Dorigny	Gravid	Culi01	aatttttaatcaataaaactggatcatttattcatatatttatgttaataaattttaaaagttttttaaattttaatatcaccccaataaaattttttattaaattataaattttaaaattctttttaatttataaataacaaaa	Culex sp.	1	19736	Culex sp.	1	8220	Both (Same sequence)
21Da	Culex pipiens/torrentium	July	2019	Dorigny	Gravid	Plas01	ttgattggttttactatttttggtacatagaagtacttatatgt	Plasmodium sp.	0.398133009	56	NA	0	0	Only Singleplex
21Da	Culex pipiens/torrentium	July	2019	Dorigny	Gravid	Aves02_mix	acttcatgggctataccttgacctgtcttgttagcggggttagagcggttgtgctcactgtggtactctcagaagaggtgag	Columba palumbus	1	4752	Columba palumbus	1	252	Both (Same sequence)
22Da	Culex pipiens/torrentium	July	2019	Dorigny	Sentinel	Plas01	ttgattggttttactatttttggtacatagaagtacttatatgt	Plasmodium sp.	0.000248602	30	NA	0	0	Only Singleplex
22Da	Culex pipiens/torrentium	July	2019	Dorigny	Sentinel	Aves02_mix	attccataggctataccttgacctgtcttattagcgtggttgggctattgcgcccactgttggtctttcagtgtaggtggg	Passer montanus	0.706732283	17951	Passer montanus	1	121	Both (Different sequence)	ataggctataccttgacctgtcttattagcgtggttgggctattgcgcccactgttggtctttcagtgtaggtggg
22Da	Culex pipiens/torrentium	July	2019	Dorigny	Sentinel	Aves02_mix	attccatgggctataccttgacctgtcgtattagcggggggctgttgcgtccactgttgggccctcaggaggggtggg	Parus major	0.293267717	7449	NA	0	0	Only Singleplex
22Da	Culex pipiens/torrentium	July	2019	Dorigny	Sentinel	Culi01	aatttttaatcaataaaactggatcatttattcatatatttatgttaataaattttaaaagttttttaaattttaatatcaccccaataaaattttttattaaattataaattttaaaattctttttaatttataaataacaaaa	Culex sp.	1	22886	Culex sp.	1	6935	Both (Same sequence)
22Da	Culex pipiens/torrentium	July	2019	Dorigny	Sentinel	Plas01	ttgattggttttactatttttggtacatagaagtacataaatgt	Plasmodium relictum	0.999751398	57839	Plasmodium relictum	1	280	Both (Same sequence)
23Da	Culex pipiens/torrentium	July	2019	Dorigny	Sentinel	Plas01	ttgattggttttactatttttggtacatagaagtacataaatgt	Plasmodium relictum	1	73	NA	0	0	Only Singleplex
23Da	Culex pipiens/torrentium	July	2019	Dorigny	Sentinel	Culi01	aatttttaatcaataaaactggatcatttattcatatatttatgttaataaattttaaaagttttttaaattttaatatcaccccaataaaattttttattaaattataaattttaaaattctttttaatttataaataacaaaa	Culex sp.	1	17021	Culex sp.	1	13646	Both (Same sequence)
24Da	Culex pipiens/torrentium	July	2019	Dorigny	Sentinel	Plas01	ttgattggtttaactatttttggtatattgaagtacttatatgt	Plasmodium sp.	0.000290624	79	NA	0	0	Only Singleplex
24Da	Culex pipiens/torrentium	July	2019	Dorigny	Sentinel	Culi01	aatttttaatcaataaaactggatcatttattcatatatttatgttaataaattttaaaagttttttaaattttaatatcaccccaataaaattttttattaaattataaattttaaaattctttttaatttataaataacaaaa	Culex sp.	1	22836	Culex sp.	1	4662	Both (Same sequence)
24Da	Culex pipiens/torrentium	July	2019	Dorigny	Sentinel	Aves02_mix	attccatgggctataccttgacctgtattagcggggggctgttgcgtccactgttgggccctcaggaggggtggg	Parus major	1	13123	Parus major	1	99	Both (Different sequence)	atgggctataccttgacctgtcgtattagcggggggctgttgcgtccactgttgggccctcaggaggggtggg
24Da	Culex pipiens/torrentium	July	2019	Dorigny	Sentinel	Plas01	ttgattggttttactatttttggtacatagaagtacataaatgt	Plasmodium relictum	0.999709376	233869	Plasmodium relictum	1	320	Both (Same sequence)
25Da	Culex pipiens/torrentium	July	2019	Dorigny	Gravid	Plas01	ttgattggttttactatttttggtacatagaagtacataaatgt	Plasmodium relictum	1	83	NA	0	0	Only Singleplex
25Da	Culex pipiens/torrentium	July	2019	Dorigny	Gravid	Aves02_mix	acttcatgggctataccttgacctgtcttgttagcggggttagagcggttgtgctcactgtggtactctcagaagaggtgag	NA	0	0	Columba palumbus	1	1187	Only Multiplex
25Da	Culex pipiens/torrentium	July	2019	Dorigny	Gravid	Aves02_mix	attccatgggctataccttgacctgtcgtattagcggggggctgttgcgtccactgttgggccctcaggaggggtggg	Parus major	1	87	NA	0	0	Only Singleplex
25Da	Culex pipiens/torrentium	July	2019	Dorigny	Gravid	Culi01	aatttttaatcaataaaactggatcatttattcatatatttatgttaataaattttaaaagttttttaaattttaatatcaccccaataaaattttttattaaattataaattttaaaattctttttaatttataaataacaaaa	Culex sp.	1	2453	NA	0	0	Only Singleplex
26Da	Culex pipiens/torrentium	August	2019	Dorigny	Sentinel	Plas01	ttgattggttttactatttttggtacatagaagtacataaatgt	Plasmodium relictum	1	88	NA	0	0	Only Singleplex
26Da	Culex pipiens/torrentium	August	2019	Dorigny	Sentinel	Aves02_mix	attccataggctataccttgacctgtcttattagcgtggttgggctattgcgcccactgttggtctttcagtgtaggtggg	Passer montanus	1	3231	Passer montanus	1	123	Both (Same sequence)
26Da	Culex pipiens/torrentium	August	2019	Dorigny	Sentinel	Culi01	aatttttaatcaataaaactggatcatttattcatatatttatgttaataaattttaaaagttttttaaattttaatatcaccccaataaaattttttattaaattataaattttaaaattctttttaatttataaataacaaaa	Culex sp.	1	4963	NA	0	0	Only Singleplex
27Da	Culex pipiens/torrentium	August	2019	Dorigny	Sentinel	Culi01	aatttttaatcaataaaactggatcatttattcatatatttatgttaataaattttaaaagttttttaaattttaatatcaccccaataaaattttttattaaattataaattttaaaattctttttaatttataaataacaaaa	Culex sp.	1	10812	Culex sp.	1	2848	Both (Same sequence)
28Da	Culex pipiens/torrentium	August	2019	Dorigny	Sentinel	Plas01	ttgattggtttaactattatttggtatattgaaataaagtatgt	Plasmodium vaughani	1	16975.75	Plasmodium vaughani	1	334	Both (Same sequence)
28Da	Culex pipiens/torrentium	August	2019	Dorigny	Sentinel	Aves02_mix	attccgtgggctataccttgacctgtcttgctagcgggttaggctattgcgtccactgttgggctatcaggaaaggtggg	Turdus sp.	1	26083	Turdus sp.	1	126	Both (Same sequence)
28Da	Culex pipiens/torrentium	August	2019	Dorigny	Sentinel	Culi01	aatttttaatcaataaaactggatcatttattcatatatttatgttaataaattttaaaagttttttaaattttaatatcaccccaataaaattttttattaaattataaattttaaaattctttttaatttataaataacaaaa	Culex sp.	1	45982	Culex sp.	1	12633	Both (Same sequence)
29Da	Culex pipiens/torrentium	September	2019	Dorigny	Sentinel	Plas01	ttgattggttttactatttttggtacatagaagtacttatatgt	Plasmodium sp.	0.333333333	14	NA	0	0	Only Singleplex
29Da	Culex pipiens/torrentium	September	2019	Dorigny	Sentinel	Aves02_mix	attccgtgggctataccttgacctgtcttgctagcgggttaggctattgcgtccactgttgggctatcaggaaaggtggg	Turdus sp.	1	13547	Turdus sp.	1	379	Both (Different sequence)	gtgggctataccttgacctgtcttgctagcgggttaggctattgcgtccactgttgggctatcaggaaaggtggg
29Da	Culex pipiens/torrentium	September	2019	Dorigny	Sentinel	Plas01	ttgattggttttactatttttggtacatagaagtacataaatgt	Plasmodium relictum	0.666666667	40	NA	0	0	Only Singleplex
29Da	Culex pipiens/torrentium	September	2019	Dorigny	Sentinel	Culi01	aatttttaatcaataaaactggatcatttattcatatatttatgttaataaattttaaaagttttttaaattttaatatcaccccaataaaattttttattaaattataaattttaaaattctttttaatttataaataacaaaa	Culex sp.	1	10920	Culex sp.	1	10135	Both (Same sequence)
2a	Culex pipiens/Culex torrentium	September	2019	Laboratory	NA	Plas01	ttgattggttttactatttttggtacatagaagtacataaatgt	Plasmodium relictum	1	18954	Plasmodium relictum	1	474	Both (Same sequence)
2a	Culex pipiens/Culex torrentium	September	2019	Laboratory	NA	Aves02_mix	ataggctataccttgacctgtcgtattagcgtggtggggctgttgcgctcactgttgggctttcagggtaggtgaa	Fringillidae	1	13807	Fringillidae	1	370	Both (Same sequence)
2a	Culex pipiens/Culex torrentium	September	2019	Laboratory	NA	Culi01	aatttttaatcaataaaactggatcatttattcatatatttatgttaataaattttaaaagttttttaaattttaatatcaccccaataaaattttttattaaattataaattttaaaattctttttaatttataaataacaaaa	Culex sp.	1	68862	Culex sp.	1	17483	Both (Same sequence)
2Da	Culex pipiens/torrentium	June	2019	Dorigny	Gravid	Culi01	aatttttaatcaataaaactggatcatttattcatatatttatgttaataaattttaaaagttttttaaattttaatatcaccccaataaaattttttattaaattataaattttaaaattctttttaatttataaataacaaaa	Culex sp.	1	41734	Culex sp.	1	8831	Both (Same sequence)
2Da	Culex pipiens/torrentium	June	2019	Dorigny	Gravid	Plas01	ttgattggttttactatttttggtacatagaagtacataaatgt	Plasmodium relictum	1	14	NA	0	0	Only Singleplex
2Da	Culex pipiens/torrentium	June	2019	Dorigny	Gravid	Aves02_mix	ataggctataccttgacctgtcttactagcgtagtagggctattgcgctcactgttgggctgtcagggaaggtgag	NA	0	0	Erithacus rubecula	1	185	Only Multiplex
2Ma	Ochlerotatus annulipes	July	2019	Monods	Net	Culi01	attttttaatcaataaaactggatcaattattcatatattaatgttaataaataataaaagttatttaaattttaataccaccccagtaaaatttttcattaaaatataaatttaattattctttttaatttataattaacaaaa	NA	0	0	Ochlerotatus sp.	1	8690	Only Multiplex
3a	Culex pipiens/Culex torrentium	September	2019	Laboratory	NA	Culi01	aatttttaatcaataaaactggatcatttattcatatatttatgttaataaattttaaaagttttttaaattttaatatcaccccaataaaattttttattaaattataaattttaaaattctttttaatttataaataacaaaa	Culex sp.	1	38089	Culex sp.	1	11680	Both (Same sequence)
3a	Culex pipiens/Culex torrentium	September	2019	Laboratory	NA	Plas01	ttgattggttttactatttttggtacatagaagtacataaatgt	Plasmodium relictum	1	21498.5	Plasmodium relictum	1	181	Both (Same sequence)
3a	Culex pipiens/Culex torrentium	September	2019	Laboratory	NA	Aves02_mix	ataggctataccttgacctgtcgtattagcgtggtggggctgttgcgctcactgttgggctttcagggtaggtgaa	Fringillidae	0.998869237	34451	Fringillidae	1	191	Both (Same sequence)
3a	Culex pipiens/Culex torrentium	September	2019	Laboratory	NA	Aves02_mix	attccataggctataccttgacctgtcttgttagcgtggtgaggctattgcgcccactgttgggctttcagtgtaggtggg	Passer domesticus	0.001130763	39	NA	0	0	Only Singleplex
3Da	Culex pipiens/torrentium	July	2019	Dorigny	Sentinel	Plas01	ttgattggtttaactattatttggtatattgaaataaagtatgt	Plasmodium vaughani	1	14187.25	Plasmodium vaughani	1	337	Both (Same sequence)
3Da	Culex pipiens/torrentium	July	2019	Dorigny	Sentinel	Aves02_mix	attccgtgggctataccttgacctgtcttgctagcgggttaggctattgcgtccactgttgggctatcaggaaaggtggg	Turdus sp.	0.999207104	18903	Turdus sp.	1	182	Both (Same sequence)
3Da	Culex pipiens/torrentium	July	2019	Dorigny	Sentinel	Aves02_mix	attccataggctataccttgacctgtcgtattagcggggtggggctgttgcgtccactgttgggccctcaggaggggtggg	Cyanistes caeruleus	0.000792896	15	NA	0	0	Only Singleplex
3Da	Culex pipiens/torrentium	July	2019	Dorigny	Sentinel	Culi01	aatttttaatcaataaaactggatcatttattcatatatttatgttaataaattttaaaagttttttaaattttaatatcaccccaataaaattttttattaaattataaattttaaaattctttttaatttataaataacaaaa	Culex sp.	1	66870	Culex sp.	1	22873	Both (Same sequence)
3Ma	Ochlerotatus cataphylla	July	2019	Monods	Sentinel	Culi01	attttttaatcaatgaaactggatcaattattcatacattaatataaataaataacaaaagttttttaaatttgaataccaccccagtaaatgttttcattaaaatataaatttaaatattccttttaatttataattaacaaaa	NA	0	0	Culicinae	1	3074	Only Multiplex
4a	Culex pipiens/Culex torrentium	September	2019	Laboratory	NA	Aves02_mix	ataggctataccttgacctgtcgtattagcgtggtggggctgttgcgctcactgttgggctttcagggtaggtgaa	Fringillidae	0.999352235	40112	Fringillidae	1	229	Both (Same sequence)
4a	Culex pipiens/Culex torrentium	September	2019	Laboratory	NA	Culi01	aatttttaatcaataaaactggatcatttattcatatatttatgttaataaattttaaaagttttttaaattttaatatcaccccaataaaattttttattaaattataaattttaaaattctttttaatttataaataacaaaa	Culex sp.	1	15550	Culex sp.	1	5723	Both (Same sequence)
4a	Culex pipiens/Culex torrentium	September	2019	Laboratory	NA	Plas01	ttgattggttttactatttttggtacatagaagtacataaatgt	Plasmodium relictum	1	22122.5	Plasmodium relictum	1	110	Both (Same sequence)
4a	Culex pipiens/Culex torrentium	September	2019	Laboratory	NA	Aves02_mix	attccataggctataccttgacctgtcttgttagcgtggtgaggctattgcgcccactgttgggctttcagtgtaggtggg	Passer domesticus	0.000647765	26	NA	0	0	Only Singleplex
4Da	Culex pipiens/torrentium	July	2019	Dorigny	Sentinel	Culi01	aatttttaatcaataaaactggatcatttattcatatatttatgttaataaattttaaaagttttttaaattttaatatcaccccaataaaattttttattaaattataaattttaaaattctttttaatttataaataacaaaa	Culex sp.	1	39279	Culex sp.	1	11752	Both (Same sequence)
4Da	Culex pipiens/torrentium	July	2019	Dorigny	Sentinel	Plas01	ttgattggttttactatttttggtacatagaagtacataaatgt	Plasmodium relictum	1	16	NA	0	0	Only Singleplex
4Da	Culex pipiens/torrentium	July	2019	Dorigny	Sentinel	Aves02_mix	attccatgggctataccttgacctgtcgtattagcggggggctgttgcgtccactgttgggccctcaggaggggtggg	Parus major	0.997460938	5107	Parus major	1	169	Both (Different sequence)	atgggctataccttgacctgtcgtattagcggggggctgttgcgtccactgttgggccctcaggaggggtggg
4Da	Culex pipiens/torrentium	July	2019	Dorigny	Sentinel	Aves02_mix	attccatgggctataccttgacctgtcttattagcgtggtggggctattgcgctcactgttgatctttcaggggaggtggg	Certhia brachydactyla	0.002539063	13	NA	0	0	Only Singleplex
4Ma	Culiseta morsitans	August	2019	Monods	Sentinel	Culi01	aatttttaatcaatataattggatcaataattcatatatttatgttaattaataataaaagtttattaaattttaataccaccccagtaaaatttttaattaagttataaatttattaattctttttaatttataaataacaaaa	Culex sp.	1	11185	Culex sp.	1	10078	Both (Different sequence)	gatttttaatcaatataattggatcaataattcatatatttatgttaattaataataaaagtttattaaattttaataccaccccagtaaaatttttaattaagttataaatttattaattctttttaatttataaataacaaaa
4Ma	Culiseta morsitans	August	2019	Monods	Sentinel	Plas01	ttgattggtttaactatttttggtatattgaagtacttatatgt	Plasmodium sp.	0.5	59	NA	0	0	Only Singleplex
4Ma	Culiseta morsitans	August	2019	Monods	Sentinel	Aves02_mix	actccataagctataccttgacctgtctttttagcgggaggggctattgggctcactattaagctctcagaagaggtgag	Buteo buteo	0.001154449	14	NA	0	0	Only Singleplex
4Ma	Culiseta morsitans	August	2019	Monods	Sentinel	Aves02_mix	atcccataggctataccttgacctgtcttactagcggggtaggctattgcgctcactgttgggctttcagtgtaggtgag	Sitta europaea	0.998845551	12113	Sitta europaea	1	192	Both (Same sequence)
4Ma	Culiseta morsitans	August	2019	Monods	Sentinel	Plas01	ttgattggttttactatttttggtacatagaagtacataaatgt	Plasmodium relictum	0.5	20	NA	0	0	Only Singleplex
5a	Culex pipiens/Culex torrentium	September	2019	Laboratory	NA	Culi01	aatttttaatcaataaaactggatcatttattcatatatttatgttaataaattttaaaagttttttaaattttaatatcaccccaataaaattttttattaaattataaattttaaaattctttttaatttataaataacaaaa	Culex sp.	1	17982	Culex sp.	1	11358	Both (Same sequence)
5a	Culex pipiens/Culex torrentium	September	2019	Laboratory	NA	Aves02_mix	ataggctataccttgacctgtcgtattagcgtggtggggctgttgcgctcactgttgggctttcagggtaggtgaa	Fringillidae	1	13711	Fringillidae	1	352	Both (Same sequence)
5a	Culex pipiens/Culex torrentium	September	2019	Laboratory	NA	Plas01	ttgattggttttactatttttggtacatagaagtacataaatgt	Plasmodium relictum	1	18454	Plasmodium relictum	1	288	Both (Same sequence)
5Da	Culex pipiens/torrentium	July	2019	Dorigny	Sentinel	Culi01	aatttttaatcaataaaactggatcatttattcatatatttatgttaataaattttaaaagttttttaaattttaatatcaccccaataaaattttttattaaattataaattttaaaattctttttaatttataaataacaaaa	Culex sp.	1	42043	Culex sp.	1	5338	Both (Same sequence)
5Da	Culex pipiens/torrentium	July	2019	Dorigny	Sentinel	Aves02_mix	ataggctataccttgacctgtcgtattagcggggtggggctgttgcgtccactgttgggccctcaggaggggtggg	NA	0	0	Parus sp.	0.561538462	73	Only Multiplex
5Da	Culex pipiens/torrentium	July	2019	Dorigny	Sentinel	Aves02_mix	attccatgggctataccttgacctgtcttattagcgtggtggggctattgcgctcactgttgatctttcaggggaggtggg	Certhia brachydactyla	0.001888277	12	NA	0	0	Only Singleplex
5Da	Culex pipiens/torrentium	July	2019	Dorigny	Sentinel	Plas01	ttgattggttttactatttttggtacatagaagtacttatatgt	Plasmodium sp.	0.333333333	74	NA	0	0	Only Singleplex
5Da	Culex pipiens/torrentium	July	2019	Dorigny	Sentinel	Aves02_mix	attccataggctataccttgacctgtcgtattagcggggtggggctgttgcgtccactgttgggccctcaggaggggtggg	Cyanistes caeruleus	0.998111723	6343	Cyanistes caeruleus	0.438461538	57	Both (Same sequence)
5Da	Culex pipiens/torrentium	July	2019	Dorigny	Sentinel	Plas01	ttgattggttttactatttttggtacatagaagtacataaatgt	Plasmodium relictum	0.666666667	46	NA	0	0	Only Singleplex
5Ma	Culex pipiens/torrentium	August	2019	Monods	Sentinel	Culi01	aatttttaatcaataaaactggatcatttattcatatatttatgttaataaattttaaaagttttttaaattttaatatcaccccaataaaattttttattaaattataaattttaaaattctttttaatttataaataacaaaa	Culex sp.	1	23666	Culex sp.	1	18976	Both (Same sequence)
5Ma	Culex pipiens/torrentium	August	2019	Monods	Sentinel	Plas01	ttgattggtttaactatttttggtatattgaagtacttatatgt	Plasmodium sp.	0.172131148	21	NA	0	0	Only Singleplex
5Ma	Culex pipiens/torrentium	August	2019	Monods	Sentinel	Aves02_mix	actccataagctataccttgacctgtctttttagcgggaggggctattgggctcactattaagctctcagaagaggtgag	Buteo buteo	1	26242	Buteo buteo	1	154	Both (Same sequence)
5Ma	Culex pipiens/torrentium	August	2019	Monods	Sentinel	Plas01	ttgattggttttactatttttggtacatagaagtacataaatgt	Plasmodium relictum	0.827868852	40	NA	0	0	Only Singleplex
6a	Culex pipiens/Culex torrentium	September	2019	Laboratory	NA	Culi01	aatttttaatcaataaaactggatcatttattcatatatttatgttaataaattttaaaagttttttaaattttaatatcaccccaataaaattttttattaaattataaattttaaaattctttttaatttataaataacaaaa	Culex sp.	1	18660	Culex sp.	1	5674	Both (Same sequence)
6a	Culex pipiens/Culex torrentium	September	2019	Laboratory	NA	Plas01	ttgattggttttactatttttggtacatagaagtacataaatgt	Plasmodium relictum	1	18304	Plasmodium relictum	1	180	Both (Same sequence)
6a	Culex pipiens/Culex torrentium	September	2019	Laboratory	NA	Aves02_mix	ataggctataccttgacctgtcgtattagcgtggtggggctgttgcgctcactgttgggctttcagggtaggtgaa	Fringillidae	1	26157	Fringillidae	1	244	Both (Same sequence)
6Da	Culex pipiens/torrentium	July	2019	Dorigny	Sentinel	Aves02_mix	attccataggctataccttgacctgtcgtattagcggggtggggctgttgcgtccactgttgggccctcaggaggggtggg	Cyanistes caeruleus	0.005620969	95	NA	0	0	Only Singleplex
6Da	Culex pipiens/torrentium	July	2019	Dorigny	Sentinel	Aves02_mix	attccatgggctataccttgacctgtcttattagcgtggtggggctattgcgctcactgttgatctttcaggggaggtggg	Certhia brachydactyla	0.994379031	16806	Certhia brachydactyla	1	169	Both (Same sequence)
6Da	Culex pipiens/torrentium	July	2019	Dorigny	Sentinel	Plas01	ttgattggttttactatttttggtacatagaagtacataaatgt	Plasmodium relictum	0.905982906	28	NA	0	0	Only Singleplex
6Da	Culex pipiens/torrentium	July	2019	Dorigny	Sentinel	Culi01	aatttttaatcaataaaactggatcatttattcatatatttatgttaataaattttaaaagttttttaaattttaatatcaccccaataaaattttttattaaattataaattttaaaattctttttaatttataaataacaaaa	Culex sp.	1	31872	Culex sp.	1	12481	Both (Same sequence)
6Da	Culex pipiens/torrentium	July	2019	Dorigny	Sentinel	Plas01	ttgattggtttaactatttttggtatattgaagtacttatatgt	Plasmodium sp.	0.094017094	11	NA	0	0	Only Singleplex
6Ma	Culiseta morsitans	September	2019	Monods	Sentinel	Aves02_mix	attccgtgggctataccttgacctgtcttgctagcgggttaggctattgcgtccactgttgggctatcaggaaaggtggg	Turdus sp.	0.659195333	16499	Turdus sp.	1	160	Both (Same sequence)
6Ma	Culiseta morsitans	September	2019	Monods	Sentinel	Plas01	ttgattggtttaactattatttggtatattgaaataaagtatgt	Plasmodium vaughani	1	13545	NA	0	0	Only Singleplex
6Ma	Culiseta morsitans	September	2019	Monods	Sentinel	Culi01	aatttttaatcaatataattggatcaataattcatatatttatgttaattaataataaaagtttattaaattttaataccaccccagtaaaatttttaattaagttataaatttattaattctttttaatttataaataacaaaa	Culex sp.	1	7330	Culex sp.	1	10708	Both (Different sequence)	gatttttaatcaatataattggatcaataattcatatatttatgttaattaataataaaagtttattaaattttaataccaccccagtaaaatttttaattaagttataaatttattaattctttttaatttataaataacaaaa
6Ma	Culiseta morsitans	September	2019	Monods	Sentinel	Aves02_mix	actccataagctataccttgacctgtctttttagcgggaggggctattgggctcactattaagctctcagaagaggtgag	Buteo buteo	0.340804667	8530	NA	0	0	Only Singleplex
7a	Culex pipiens/Culex torrentium	September	2019	Laboratory	NA	Aves02_mix	attccataggctataccttgacctgtcttgttagcgtggtgaggctattgcgcccactgttgggctttcagtgtaggtggg	Passer domesticus	1	1282	Passer sp.	1	150	Both (Different sequence)	ataggctataccttgacctgtcttgttagcgtggtgaggctattgcgcccactgttgggctttcagtgtaggtggg
7a	Culex pipiens/Culex torrentium	September	2019	Laboratory	NA	Plas01	ttgattggttttactatttttggtacatagaagtacataaatgt	Plasmodium relictum	1	20391	Plasmodium relictum	1	247	Both (Same sequence)
7a	Culex pipiens/Culex torrentium	September	2019	Laboratory	NA	Culi01	aatttttaatcaataaaactggatcatttattcatatatttatgttaataaattttaaaagttttttaaattttaatatcaccccaataaaattttttattaaattataaattttaaaattctttttaatttataaataacaaaa	Culex sp.	1	14399	Culex sp.	1	4257	Both (Same sequence)
7Da	Culex pipiens/torrentium	July	2019	Dorigny	Sentinel	Plas01	ttgattggttttactatttttggtacatagaagtacataaatgt	Plasmodium relictum	0.75	36	NA	0	0	Only Singleplex
7Da	Culex pipiens/torrentium	July	2019	Dorigny	Sentinel	Culi01	aatttttaatcaataaaactggatcatttattcatatatttatgttaataaattttaaaagttttttaaattttaatatcaccccaataaaattttttattaaattataaattttaaaattctttttaatttataaataacaaaa	Culex sp.	1	38945	Culex sp.	1	11902	Both (Same sequence)
7Da	Culex pipiens/torrentium	July	2019	Dorigny	Sentinel	Plas01	ttgattggtttaactatttttggtatattgaagtacttatatgt	Plasmodium sp.	0.25	12	NA	0	0	Only Singleplex
7Da	Culex pipiens/torrentium	July	2019	Dorigny	Sentinel	Aves02_mix	attccatgggctataccttgacctgtcttattagcgtggtggggctattgcgctcactgttgatctttcaggggaggtggg	Certhia brachydactyla	1	12680	Certhia brachydactyla	1	106	Both (Same sequence)
7Ma	Culiseta morsitans	September	2019	Monods	Sentinel	Culi01	aatttttaatcaatataattggatcaataattcatatatttatgttaattaataataaaagtttattaaattttaataccaccccagtaaaatttttaattaagttataaatttattaattctttttaatttataaataacaaaa	Culex sp.	1	6828	Culex sp.	1	3416	Both (Different sequence)	gatttttaatcaatataattggatcaataattcatatatttatgttaattaataataaaagtttattaaattttaataccaccccagtaaaatttttaattaagttataaatttattaattctttttaatttataaataacaaaa
7Ma	Culiseta morsitans	September	2019	Monods	Sentinel	Plas01	ttgattggtttaactatttttggtatattgaagtacttatatgt	Plasmodium sp.	1	14	NA	0	0	Only Singleplex
7Ma	Culiseta morsitans	September	2019	Monods	Sentinel	Aves02_mix	attccgtgggctataccttgacctgtcttgctagcgggttaggctattgcgtccactgttgggctatcaggaaaggtggg	Turdus sp.	1	20025	Turdus sp.	1	180	Both (Same sequence)
8a	Culex pipiens/Culex torrentium	September	2019	Laboratory	NA	Plas01	ttgattggttttactatttttggtacatagaagtacataaatgt	Plasmodium relictum	1	19121	Plasmodium relictum	1	543	Both (Same sequence)
8a	Culex pipiens/Culex torrentium	September	2019	Laboratory	NA	Aves02_mix	attccataggctataccttgacctgtcttgttagcgtggtgaggctattgcgcccactgttgggctttcagtgtaggtggg	Passer sp.	1	1181	Passer sp.	1	101	Both (Same sequence)
8a	Culex pipiens/Culex torrentium	September	2019	Laboratory	NA	Culi01	aatttttaatcaataaaactggatcatttattcatatatttatgttaataaattttaaaagttttttaaattttaatatcaccccaataaaattttttattaaattataaattttaaaattctttttaatttataaataacaaaa	Culex sp.	1	10373	Culex sp.	1	5027	Both (Same sequence)
8Da	Culex pipiens/torrentium	July	2019	Dorigny	Sentinel	Plas01	ttgattggttttactatttttggtacatagaagtacataaatgt	NA	0	0	Plasmodium relictum	1	1099	Only Multiplex
8Da	Culex pipiens/torrentium	July	2019	Dorigny	Sentinel	Aves02_mix	attccatgggctataccttgacctgtattagcggggggctgttgcgtccactgttgggccctcaggaggggtggg	Parus major	1	35895	Parus major	1	150	Both (Different sequence)	atgggctataccttgacctgtcgtattagcggggggctgttgcgtccactgttgggccctcaggaggggtggg
8Da	Culex pipiens/torrentium	July	2019	Dorigny	Sentinel	Culi01	aatttttaatcaataaaactggatcatttattcatatatttatgttaataaattttaaaagttttttaaattttaatatcaccccaataaaattttttattaaattataaattttaaaattctttttaatttataaataacaaaa	Culex sp.	1	28615	Culex sp.	1	4528	Both (Same sequence)
9a	Culex pipiens/Culex torrentium	September	2019	Laboratory	NA	Aves02_mix	attccataggctataccttgacctgtcttgttagcgtggtgaggctattgcgcccactgttgggctttcagtgtaggtggg	Passer domesticus	1	1579	Passer sp.	1	107	Both (Different sequence)	ataggctataccttgacctgtcttgttagcgtggtgaggctattgcgcccactgttgggctttcagtgtaggtggg
9a	Culex pipiens/Culex torrentium	September	2019	Laboratory	NA	Plas01	ttgattggttttactatttttggtacatagaagtacataaatgt	Plasmodium relictum	1	11053.5	Plasmodium relictum	1	272	Both (Same sequence)
9a	Culex pipiens/Culex torrentium	September	2019	Laboratory	NA	Culi01	aatttttaatcaataaaactggatcatttattcatatatttatgttaataaattttaaaagttttttaaattttaatatcaccccaataaaattttttattaaattataaattttaaaattctttttaatttataaataacaaaa	Culex sp.	1	14721	Culex sp.	1	11427	Both (Same sequence)
9Da	Culex pipiens/torrentium	July	2019	Dorigny	Sentinel	Aves02_mix	ataggctataccttgacctgtcgtattagcggggtggggctgttgcgtccactgttgggccctcaggaggggtggg	NA	0	0	Parus sp.	0.59862013	87	Only Multiplex
9Da	Culex pipiens/torrentium	July	2019	Dorigny	Sentinel	Aves02_mix	attccataggctataccttgacctgtcgtattagcggggtggggctgttgcgtccactgttgggccctcaggaggggtggg	Cyanistes caeruleus	1	7364	Cyanistes caeruleus	0.40137987	57	Both (Same sequence)
9Da	Culex pipiens/torrentium	July	2019	Dorigny	Sentinel	Culi01	aatttttaatcaataaaactggatcatttattcatatatttatgttaataaattttaaaagttttttaaattttaatatcaccccaataaaattttttattaaattataaattttaaaattctttttaatttataaataacaaaa	Culex sp.	1	26382	Culex sp.	1	1446	Both (Same sequence)
